# Supplementary material for: Earthquake preparedness among religious minority groups: the case of the Jewish ultra-Orthodox society in Israel
Source: Copernicus journal article supplement (doi:10.5194/nhess-21-317-2021), 2021-01-27
Supplement: Supplementary file 1 [file nhess-21-317-2021-supplement.pdf]

Supplement of Nat. Hazards Earth Syst. Sci., 21, 317–337, 2021  
<https://doi.org/10.5194/nhess-21-317-2021-supplement>  
© Author(s) 2021. This work is distributed under  
the Creative Commons Attribution 4.0 License.

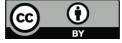

*Supplement of*

## **Earthquake preparedness among religious minority groups: the case of the Jewish ultra-Orthodox society in Israel**

**Zvika Orr et al.**

*Correspondence to:* Amotz Agnon ([amotz@mail.huji.ac.il](mailto:amotz@mail.huji.ac.il))

The copyright of individual parts of the supplement might differ from the CC BY 4.0 License.

### Supplement 1 – Quantitative Questionnaire

1. Gender (male/female)
2. Age \_\_\_\_\_
3. City/town of residence \_\_\_\_\_
4. Neighborhood of residence \_\_\_\_\_
5. Marital status
  1. Single
  2. Married
  3. Divorced
  4. Widowed
6. Do you have children? Yes/No  
 If Yes, number of children \_\_\_\_\_ at ages \_\_\_\_\_
7. What, in your opinion, is the likelihood that a disastrous earthquake will occur in Israel within the next five years?
  1. No chance
  2. Low likelihood
  3. Medium likelihood
  4. High likelihood
  5. Certainly
8. What, in your opinion, is the likelihood that a disastrous earthquake will occur in your area within the next five years?
  1. No chance
  2. Low likelihood
  3. Medium likelihood
  4. High likelihood
  5. Certainly
9. To what extent do you agree with the following statements?

|   |                                                                                                          | Totally disagree | Agree to an extent | Quite agree | Much agree | Very much agree | Do not know | Irrelevant |
|---|----------------------------------------------------------------------------------------------------------|------------------|--------------------|-------------|------------|-----------------|-------------|------------|
| 1 | I do not believe that an earthquake will occur in my area and therefore do not need to prepare           |                  |                    |             |            |                 |             |            |
| 2 | Regarding an earthquake, I think "what will be will be," hence I do not prepare                          |                  |                    |             |            |                 |             |            |
| 3 | I think that we need to do everything possible in order to prepare for an earthquake                     |                  |                    |             |            |                 |             |            |
| 4 | The forecasted scenarios following an earthquake are exaggerated, therefore it is unnecessary to prepare |                  |                    |             |            |                 |             |            |

|    |                                                                                                                             |  |  |  |  |  |  |  |
|----|-----------------------------------------------------------------------------------------------------------------------------|--|--|--|--|--|--|--|
| 5  | I think that, even if there will be an earthquake in my place, improvisations may solve the situation                       |  |  |  |  |  |  |  |
| 6  | Even if an earthquake occurs, I will know what to do - we have been adequately exposed to emergencies in this country       |  |  |  |  |  |  |  |
| 7  | The idea of an earthquake is so frightening - I avoid thinking of it                                                        |  |  |  |  |  |  |  |
| 8  | The chance to survive an earthquake is so slight, that preparing is not worthwhile                                          |  |  |  |  |  |  |  |
| 9  | I feel that I will be able to deal with an earthquake situation                                                             |  |  |  |  |  |  |  |
| 10 | Earthquake damages are avoidable with "proper" preparation                                                                  |  |  |  |  |  |  |  |
| 11 | I have the knowledge and aptitude that will help me mitigate in case of an earthquake                                       |  |  |  |  |  |  |  |
| 12 | I do what it takes to prepare for the possibility of an earthquake even if it costs money and requires time                 |  |  |  |  |  |  |  |
| 13 | I actively look for information regarding earthquake preparedness                                                           |  |  |  |  |  |  |  |
| 14 | Earthquake preparedness is a religious obligation enforced by the directive that one must guard one's own life (hishtadlus) |  |  |  |  |  |  |  |
| 15 | Earthquake preparedness suits people with deficient beliefs                                                                 |  |  |  |  |  |  |  |
| 16 | Should there be organized instruction in the community, I would like to learn how to prepare for an earthquake              |  |  |  |  |  |  |  |

10. Does your apartment provide a sheltered space?

1. Yes
2. No
3. Irrelevant

11. Houses erected in Israel before 1995 were not constructed according to the contemporary Earthquake Code.

Does your home pass that Earthquake Code?

1. Yes
2. Probably yes
3. Probably not
4. No
5. Do not know

12. Does your home pass the Earthquake Code of 1980?

1. Yes

- 2. Probably yes
- 3. Probably not
- 4. No
- 5. Do not know

13. Were the foundations of your home retrofitted, e.g. under State Master Plan 38?

- 1. Yes
- 2. No
- 3. Do not know
- 4. Irrelevant

14. Have you or others insured your home against earthquake hazard?

- 1. Yes
- 2. No
- 3. Do not know
- 4. Irrelevant - I do not own a home

15. To the best of your knowledge, what measures can a family take to prepare for an earthquake?

\_\_\_\_\_

16. In preparation for an earthquake one is required to stabilize bookshelves and fasten them to walls; support water tanks, gas tanks and air-conditioners; store toxics and inflammables away from heat sources; keep heavy objects close to the floor. Have you prepared according to all, or some, of the above precautions?

- 1. Yes
- 2. No
- 3. Partially. Please detail: \_\_\_\_\_

17. Do you have emergency equipment available in your home, such as a first aid kit, water and canned food, medicines, battery-powered flashlight and radio, etc.?

- 1. Yes
- 2. No
- 3. Some of the equipment. Please specify: \_\_\_\_\_

18. What will you do in case (Heaven forbid) that you feel an earthquake?

\_\_\_\_\_

19. Do you and your family know the safety guidelines for behavior in the event of an earthquake (such as switching off electricity and gas lines, exiting to an open area away from buildings or entering a safe room or stairwell)?

- 1. Yes
- 2. No
- 3. Partially. Please specify \_\_\_\_\_

20. Are you and your household members acquainted with the safety instructions for an earthquake?

- 1. Yes
- 2. No
- 3. Partially. Please detail: \_\_\_\_\_

21. (for parents of minors)

Have you discussed the safety instructions for an earthquake with your children?

1. Yes
2. No
3. Partially. Please detail: \_\_\_\_\_

22. Have you practiced with your children proper behavior during an earthquake?

1. Yes
2. No
3. Partially. Please detail: \_\_\_\_\_

23. Overall, have you prepared for the possibility of an earthquake in Israel?

1. Not at all
2. To a minor extent
3. To a moderate extent
4. To a large extent
5. To a very large extent
6. Do not know

24. Occasionally earthquake protection instructions are published in the various media. Have you come across such publications?

1. Yes
2. No

25. If so, where did you come across a publication on the subject?

1. Newspapers
2. Direct mail
3. Radio
4. Websites
5. Other \_\_\_\_\_

26. What do you remember from the publication you saw or heard? \_\_\_\_\_

27. In your view, is the fact that instructions arrive from the military authorities significant for the ultra-Orthodox public? \_\_\_\_\_

28. To the best of your knowledge, is there a religious duty to prepare for an earthquake?

\_\_\_\_\_

29. In your opinion, how can awareness for earthquake preparedness be raised in the ultra-Orthodox public?

\_\_\_\_\_

30. Will a Halakhic ruling or a rabbi instruction convince you to prepare for an earthquake?

\_\_\_\_\_

31. What are the strong aspects of your community which might assist the entire community to function under an emergency? \_\_\_\_\_

32. The solidarity in the ultra-Orthodox society is commendable. How in your view is it possible to translate this solidarity for promoting the earthquake preparedness of the ultra-Orthodox public?

\_\_\_\_\_

33. Education

Male: (secondary/tertiary/academic/Yeshiva)

Female: (primary/secondary/tertiary/academic)

34. Community you belong to \_\_\_\_\_

35. Your estimate of your economic status:

1. Below average
2. Average
3. Above average
4. Refuse to answer

36. What type of mobile phone do you typically possess:

1. Kosher
2. Basic with texting
3. Supports Kosher
4. Protected smartphone
5. Unprotected smartphone
6. I do not hold a cellular phone

37. Is there anything else you would like to add regarding earthquake preparedness in Israel?

\_\_\_\_\_

## Supplement 2 – Qualitative Interview Guide

Note: This basic interview guide (qualitative questionnaire) includes issues and questions that are common to a broad range of interviewees. We adapted each interview guide according to the specific interviewee's organization, professional field, expertise, etc.

1. Can you please give some background about your organization?
2. In which activities does your organization participate regarding earthquake preparedness?
3. Does your organization promote preparedness for earthquakes in the ultra-Orthodox society as well? If so, I would appreciate hearing about such activities. What do they include?
4. Is the activity in the ultra-Orthodox society similar to the activities in other societies? Does the work with this society require adjustments?
5. Are you aware of special challenges in the work with the ultra-Orthodox public? If so, what are these challenges?
6. Are you aware of special opportunities in the work with the ultra-Orthodox public? If so, what are these opportunities?
7. What, in your opinion, can be improved or strengthened in the work of your organization with the ultra-Orthodox public?
8. How, in your opinion, can the awareness for earthquake preparedness be elevated within the ultra-Orthodox public?
9. Is it significant in the ultra-Orthodox public that the instructions on this topic arrive from the Home Front Command and the state authorities?
10. To the best of your knowledge, what is the Halakha's (the collective body of Jewish religious laws) position regarding earthquake preparedness?
11. In your experience, how does the Jewish Halakha and the faith of ultra-Orthodox Jews affect their actual preparedness?
12. In your view, which characteristics of the ultra-Orthodox society assist or impede its functioning under a state of emergency?
13. The ultra-Orthodox society is characterized by strong solidarity. Do you view it feasible to harness this solidarity to promote the preparedness of the ultra-Orthodox public for an earthquake? If so, how?
14. Is there anything you wish to add regarding the topic of this research? Anything that I did not ask about and is important for us to know?
15. Whom else would you recommend us to talk with?
16. We would like to talk with relevant key figures in the ultra-Orthodox community. Are there people in the ultra-Orthodox society whom you work with and who might assist us?

### Supplement 3 – Quantitative Findings

Level of belief regarding the occurrence of an earthquake

|                                                                                                                                  | No chance<br>(1) | Low likelihood<br>(2) | Medium likelihood<br>(3) | High likelihood<br>(4) | Certainly<br>(5) | Mean | SD    |
|----------------------------------------------------------------------------------------------------------------------------------|------------------|-----------------------|--------------------------|------------------------|------------------|------|-------|
| What, in your opinion, is the likelihood that a disastrous earthquake will occur <u>in Israel</u> within the next five years?    | 17%              | 38%                   | 33%                      | 11%                    | 1%               | 2.39 | 0.927 |
| What, in your opinion, is the likelihood that a disastrous earthquake will occur <u>in your area</u> within the next five years? | 22%              | 42%                   | 24%                      | 12%                    | 0%               | 2.24 | 0.928 |

To what extent do you agree with the following statements?

|                                                                                                                             | Totally disagree | Agree to an extent | Quite agree | Much agree | Very much agree | Do not know |
|-----------------------------------------------------------------------------------------------------------------------------|------------------|--------------------|-------------|------------|-----------------|-------------|
| I do not believe that an earthquake will occur in my area and therefore do not need to prepare                              | 59%              | 17%                | 12%         | 8%         | 3%              | 1%          |
| Regarding an earthquake, I think "what will be will be," hence I do not prepare                                             | 67%              | 15%                | 9%          | 5%         | 3%              | 1%          |
| The forecasted scenarios following an earthquake are exaggerated, therefore it is unnecessary to prepare                    | 63%              | 16%                | 9%          | 7%         | 4%              | 1%          |
| The chance to survive an earthquake is so slight, that preparing is not worthwhile                                          | 80%              | 14%                | 2%          | 1%         | 2%              | 1%          |
| Earthquake preparedness is a religious obligation enforced by the directive that one must guard one's own life (hishtadlus) | 17%              | 11%                | 26%         | 22%        | 24%             | 0%          |
| I think that, even if there will be an earthquake in my place, improvisations may solve the situation                       | 52%              | 20%                | 12%         | 8%         | 5%              | 3%          |
| Even if an earthquake occurs, I will know what to do - we have been adequately exposed to emergencies in this country       | 48%              | 24%                | 13%         | 7%         | 4%              | 4%          |
| I feel that I will be able to deal with an earthquake situation                                                             | 24%              | 20%                | 23%         | 21%        | 6%              | 6%          |
| I have the knowledge and aptitude that will help me mitigate in case of an earthquake                                       | 31%              | 28%                | 23%         | 12%        | 4%              | 2%          |
| I do what it takes to prepare for the possibility of an earthquake even if it costs money and requires time                 | 53%              | 22%                | 12%         | 7%         | 4%              | 2%          |
| I actively look for information regarding earthquake preparedness                                                           | 66%              | 15%                | 10%         | 4%         | 1%              | 4%          |



|                                                                                                                                                                                                                                                                                                                              | Yes | No  |
|------------------------------------------------------------------------------------------------------------------------------------------------------------------------------------------------------------------------------------------------------------------------------------------------------------------------------|-----|-----|
| In preparation for an earthquake one is required to stabilize bookshelves and fasten them to walls; support water tanks, gas tanks and air-conditioners; store toxics and inflammables away from heat sources; keep heavy objects close to the floor. Have you prepared according to all, or some, of the above precautions? | 23% | 77% |
| Do you have emergency equipment available in your home, such as a first aid kit, water and canned food, medicines, battery-powered flashlight and radio, etc.?                                                                                                                                                               | 48% | 52% |
| Do you and your family know the safety guidelines for behavior in the event of an earthquake (such as a switching off electricity and gas lines, exiting to an open area away from buildings or entering a safe room or stairwell)?                                                                                          | 51% | 49% |
| Have you discussed the safety instructions for an earthquake with your children?                                                                                                                                                                                                                                             | 15% | 85% |
| Have you practiced with your children proper behavior during an earthquake?                                                                                                                                                                                                                                                  | 3%  | 97% |

|                                                                                                                                                    | Yes /<br>Probably yes | Probably not<br>/ No | Do not know |
|----------------------------------------------------------------------------------------------------------------------------------------------------|-----------------------|----------------------|-------------|
| Houses erected in Israel before 1995 were not constructed according to the contemporary Earthquake Code. Does your home pass that Earthquake Code? | 39%                   | 49%                  | 12%         |
| Does your home pass the Earthquake Code of 1980?                                                                                                   | 47%                   | 36%                  | 17%         |

|                                                                            | Not at all | To a minor extent | To a moderate extent | To a large / a very large extent |
|----------------------------------------------------------------------------|------------|-------------------|----------------------|----------------------------------|
| Overall, have you prepared for the possibility of an earthquake in Israel? | 45%        | 31%               | 18%                  | 6%                               |

|                                                                                                                             | Yes | No  |
|-----------------------------------------------------------------------------------------------------------------------------|-----|-----|
| Occasionally earthquake protection instructions are published in the various media. Have you come across such publications? | 46% | 54% |

|                                                                | Newspapers | Websites | Direct mail | Radio |
|----------------------------------------------------------------|------------|----------|-------------|-------|
| If so, where did you come across a publication on the subject? | 41%        | 31%      | 8%          | 20%   |
